# Supplementary material for: The Mental Health of Frontline Health Care Providers During Pandemics: A Rapid Review of the Literature
Source: Atypon-hosted journal article supplement (doi:10.1176/appi.ps.202000274), 2020-10-06
Supplement: appi.ps.202000274.ds001.pdf [file appi.ps.202000274.ds001.pdf]

**Online Supplement**

1. Search Strategy (p 2)
2. Review Strategy (p 3)
3. Supplementary Figure: Study Flow Diagram (p 4)
4. References for All Included Studies (p 5)

## 1. Search Strategy

### PubMed

Search conducted on March 28, 2020

*(psycho\* or psycholo\* or "mental health" or "mental disorder" or suicide or stress or fear or panic or anxiety\* or depressi\* or trauma or ptsd or post-traumatic stress disorder [Title/Abstract]) AND (pandemic or ebola or "swine flu" or H1N1 or "severe acute respiratory syndrome" or "middle east respiratory syndrome"[Title/Abstract])*

### PsycINFO

Searches conducted on March 28, 2020

Multi-field search of MESH subject terms, titles, and abstracts for *mental health or mental disorder or psych\* or psycholo\* or suicide or stress or fear or panic or anxiety\* or depressi\* or trauma or ptsd or post-traumatic stress disorder AND pandemic or ebola or swine flu or H1N1 or severe acute respiratory syndrome or middle east respiratory syndrome*

### MEDLINE

Searches conducted on March 28, 2020

*((mental health) or mental disorder) or psych\*) or psycholo\*) or suicide) or stress) or fear) or panic) or anxiety\*) or depressi\*) or trauma) or ptsd) or post-traumatic stress disorder)) AND (pandemic) or coronavirus) or COVID-19) or ebola) or swineflu) or H1N1) or severe acute respiratory syndrome) or middle east respiratory syndrome))*

## 2. Review Strategy

Studies were manually reviewed for inclusion by title, abstract, then full paper.

### *Inclusion criteria*

- Peer-reviewed
- English language
- Published from 2000-2020
- At least one factor related to mental health among healthcare providers during SARS, MERS, Ebola, and Swine Flu, including: prevalence of mental illness or psychological wellbeing, factors associated with mental illness or psychological wellbeing; evaluations of interventions to support mental health of providers during these outbreaks

### *Exclusion criteria at each review phase:*

#### Title

- Does not reference a chosen pandemic
- Commentary, opinion piece, protocol, or review
- Not in a peer-reviewed journal

#### Abstract

Same as title review, plus:

- Related to mental health of non-providers (patients, public)
- Outcomes evaluated are not programmatic
- Not in English

#### Full Paper

Same as title and abstract review, plus:

- Analyzes mental health in anticipation of an outbreak
- Analyzes mental health among providers far in location from the outbreak
- No outcome related to provider mental health
- Mental health unevaluated component of intervention
- Full paper unavailable

### 3. Supplementary Figure: Study Flow Diagram

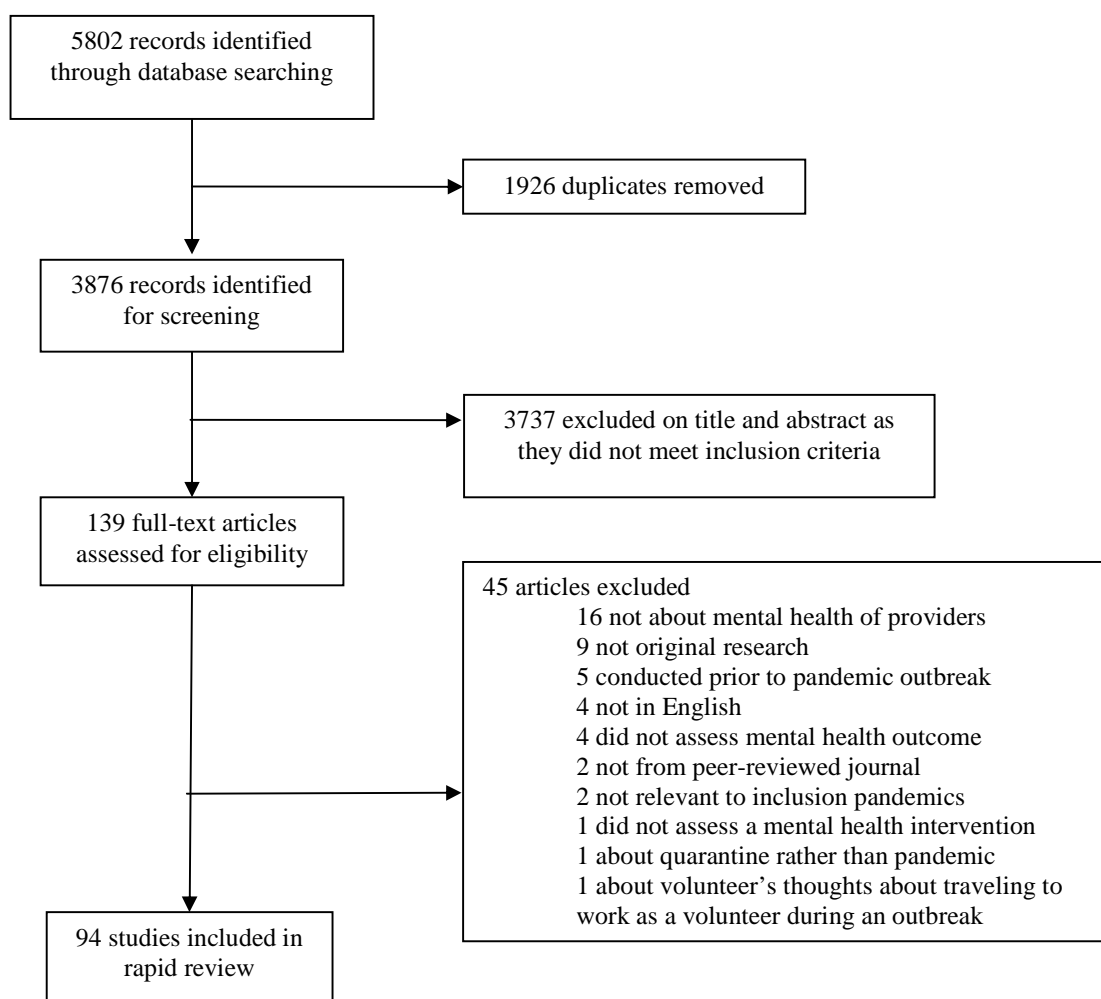

#### 4. References for All Included Studies

Abolfotouh MA, AlQarni AA, Al-Ghamdi SM, et al.: An assessment of the level of concern among hospital-based health-care workers regarding MERS outbreaks in Saudi Arabia. *BMC Infect Dis* 17:4, 2017

Al Ghobain M, Aldrees T, Alenezi A, et al.: Perception and Attitude of Emergency Room Resident Physicians toward Middle East Respiratory Syndrome Outbreak. *Emerg Med Int* 2017:6978256, 2017

Al Knawy BA, Al-Kadri HMF, Elbarbary M, et al.: Perceptions of postoutbreak management by management and healthcare workers of a Middle East respiratory syndrome outbreak in a tertiary care hospital: a qualitative study. *BMJ open* 9:e017476, 2019

Al-Rabiaah A, Temsah MH, Al-Eyadhy AA, et al.: Middle East Respiratory Syndrome-Corona Virus (MERS-CoV) associated stress among medical students at a university teaching hospital in Saudi Arabia. *J Infect Public Health*, 2020

Alsahafi AJ, Cheng AC: Knowledge, Attitudes and Behaviours of Healthcare Workers in the Kingdom of Saudi Arabia to MERS Coronavirus and Other Emerging Infectious Diseases. *Int J Environ Res Public Health* 13, 2016

Alsubaie S, Hani Temsah M, Al-Eyadhy AA, et al.: Middle East Respiratory Syndrome Coronavirus epidemic impact on healthcare workers' risk perceptions, work and personal lives. *J Infect Dev Ctries* 13:920-6, 2019

Andertun S, Hornsten A, Hajdarevic S: Ebola virus disease: caring for patients in Sierra Leone - a qualitative study. *J Adv Nurs* 73:643-52, 2017

Bai Y, Lin CC, Lin CY, et al.: Survey of stress reactions among health care workers involved with the SARS outbreak. *Psychiatr Serv* 55:1055-7, 2004

Belfroid E, Mollers M, Smit PW, et al.: Positive experiences of volunteers working in deployable laboratories in West Africa during the Ebola outbreak. *PLoS One* 13:e0196320, 2018

Belfroid E, van Steenberg J, Timen A, et al.: Preparedness and the importance of meeting the needs of healthcare workers: a qualitative study on Ebola. *J Hosp Infect* 98:212-8, 2018

Bell SA, Munro-Kramer ML, Eisenberg MC, et al.: "Ebola kills generations": Qualitative discussions with Liberian healthcare providers. *Midwifery* 45:44-9, 2017

Bergeron SM, Cameron S, Armstrong-Stassen M, et al.: Diverse implications of a national health crisis: A qualitative exploration of community nurses' SARS experiences. *Can J Nurs Res* 38:42-54, 2006

- Broom J, Broom A, Bowden V: Ebola outbreak preparedness planning: a qualitative study of clinicians' experiences. *Public Health* 143:103-8, 2017
- Bukhari EE, Temsah MH, Aleyadhy AA, et al.: Middle East respiratory syndrome coronavirus (MERS-CoV) outbreak perceptions of risk and stress evaluation in nurses. *J Infect Dev Ctries* 10:845-50, 2016
- Carter SE, O'Reilly M, Frith-Powell J, et al.: Treatment Seeking and Ebola Community Care Centers in Sierra Leone: A Qualitative Study. *J Health Commun* 22:66-71, 2017
- Chan AO, Huak CY: Psychological impact of the 2003 severe acute respiratory syndrome outbreak on health care workers in a medium size regional general hospital in Singapore. *Occup Med (Lond)* 54:190-6, 2004
- Chen CS, Wu HY, Yang P, et al.: Psychological distress of nurses in Taiwan who worked during the outbreak of SARS. *Psychiatr Serv* 56:76-9, 2005
- Chen CS, Yang P, Yen CF, et al.: Validation of Impact of Events Scale in nurses under threat of contagion by severe acute respiratory syndrome. *Psychiatry Clin Neurosci* 59:135-9, 2005
- Chen NH, Wang PC, Hsieh MJ, et al.: Impact of severe acute respiratory syndrome care on the general health status of healthcare workers in taiwan. *Infect Control Hosp Epidemiol* 28:75-9, 2007
- Chen R, Chou KR, Huang YJ, et al.: Effects of a SARS prevention programme in Taiwan on nursing staff's anxiety, depression and sleep quality: a longitudinal survey. *Int J Nurs Stud* 43:215-25, 2006
- Chen WK, Cheng YC, Chung YT, et al.: The impact of the SARS outbreak on an urban emergency department in Taiwan. *Med Care* 43:168-72, 2005.
- Chiang HH, Chen MB, Sue IL: Self-state of nurses in caring for SARS survivors. *Nurs Ethics* 14:18-26, 2007
- Chong MY, Wang WC, Hsieh WC, et al.: Psychological impact of severe acute respiratory syndrome on health workers in a tertiary hospital. *Br J Psychiatry* 185:127-33, 2004
- Chua SE, Cheung V, Cheung C, et al.: Psychological effects of the SARS outbreak in Hong Kong on high-risk health care workers. *Can J Psychiatry* 49:391-3, 2004
- Chung BP, Wong TK, Suen ES, et al.: SARS: caring for patients in Hong Kong. *J Clin Nurs* 14:510-7, 2005

- Cunningham T, Rosenthal D, Catalozzi M: Narrative medicine practices as a potential therapeutic tool used by expatriate Ebola caregivers. *Intervention: Journal of Mental Health and Psychosocial Support in Conflict Affected Areas* 15:106-19, 2017
- Dong L, Bouey J: Public Mental Health Crisis during COVID-19 Pandemic, China. *Emerg Infect Dis* 26, 2020
- El Gaafary MM, Abd Elaziz KM, Abdel-Rahman AG, et al.: Concerns, perceived impacts and preparedness of health care workers in a referral hospital in Egypt in facing influenza (H1N1) epidemic. *J Prev Med Hyg* 51:105-9, 2010
- Englert EG, Kiwanuka R, Neubauer LC: 'When I die, let me be the last.' Community health worker perspectives on past Ebola and Marburg outbreaks in Uganda. *Glob Public Health* 14:1182-92, 2019
- Erland E, Dahl B: Midwives' experiences of caring for pregnant women admitted to Ebola centres in Sierra Leone. *Midwifery* 55:23-8, 2017
- Gee S, Skovdal M: Public Discourses of Ebola Contagion and Courtesy Stigma: The Real Risk to International Health Care Workers Returning Home From the West Africa Ebola Outbreak? *Qual Health Res* 28:1499-508, 2018
- Gershon RR, Magda LA, Canton AN, et al.: Pandemic-related ability and willingness in home healthcare workers. *Am J Disaster Med* 5:15-26, 2010
- Goulia P, Mantas C, Dimitroula D, et al.: General hospital staff worries, perceived sufficiency of information and associated psychological distress during the A/H1N1 influenza pandemic. *BMC Infect Dis* 10:322, 2010
- Grace SL, Hershfield K, Robertson E, et al.: The occupational and psychosocial impact of SARS on academic physicians in three affected hospitals. *Psychosomatics* 46:385-91, 2005
- Hewlett BL, Hewlett BS: Providing care and facing death: nursing during Ebola outbreaks in central Africa. *J Transcult Nurs* 16:289-97, 2005
- Ho SM, Kwong-Lo RS, Mak CW, et al.: Fear of severe acute respiratory syndrome (SARS) among health care workers. *J Consult Clin Psychol* 73:344-9, 2005
- Holroyd E, McNaught C: The SARS crisis: reflections of Hong Kong nurses. *Int Nurs Rev* 55:27-33, 2008
- Ji D, Ji YJ, Duan XZ, et al.: Prevalence of psychological symptoms among Ebola survivors and healthcare workers during the 2014-2015 Ebola outbreak in Sierra Leone: a cross-sectional study. *Oncotarget* 8:12784-91, 2017
- Jung H, Jung SY, Lee MH, et al.: Assessing the Presence of Post-Traumatic Stress and Turnover Intention Among Nurses Post-Middle East Respiratory Syndrome Outbreak: The Importance of Supervisor Support. *Workplace health & safety*:2165079919897693, 2020

- Kang HS, Son YD, Chae SM, et al.: Working experiences of nurses during the Middle East respiratory syndrome outbreak. *Int J Nurs Pract* 24:e12664, 2018
- Khalid I, Khalid TJ, Qabajah MR, et al.: Healthcare Workers Emotions, Perceived Stressors and Coping Strategies During a MERS-CoV Outbreak. *Clin Med Res* 14:7-14, 2016
- Kim CJ, Yoo HR, Yoo MS, et al.: Attitude, beliefs, and intentions to care for SARS patients among Korean clinical nurses: an application of theory of planned behavior. *Taehan Kanho Hakhoe Chi* 36:596-603, 2006
- Kim JS, Choi JS: Factors Influencing Emergency Nurses' Burnout During an Outbreak of Middle East Respiratory Syndrome Coronavirus in Korea. *Asian Nurs Res (Korean Soc Nurs Sci)* 10:295-9, 2016
- Kim Y: Nurses' experiences of care for patients with Middle East respiratory syndrome-coronavirus in South Korea. *Am J Infect Control* 46:781-7, 2018
- Koh D, Lim MK, Chia SE, et al.: Risk perception and impact of Severe Acute Respiratory Syndrome (SARS) on work and personal lives of healthcare workers in Singapore: what can we learn? *Med Care* 43:676-82, 2005
- Lancee WJ, Maunder RG, Goldbloom DS: Prevalence of psychiatric disorders among Toronto hospital workers one to two years after the SARS outbreak. *Psychiatr Serv* 59:91-5, 2008
- Lee SH, Juang YY, Su YJ, et al.: Facing SARS: psychological impacts on SARS team nurses and psychiatric services in a Taiwan general hospital. *Gen Hosp Psychiatry* 27:352-8, 2005
- Lee SM, Kang WS, Cho AR, et al.: Psychological impact of the 2015 MERS outbreak on hospital workers and quarantined hemodialysis patients. *Compr Psychiatry* 87:123-7, 2018
- Li L, Wan C, Ding R, et al.: Mental distress among Liberian medical staff working at the China Ebola Treatment Unit: a cross sectional study. *Health Qual Life Outcomes* 13:156, 2015
- Li Y, Wang H, Jin XR, et al.: Experiences and challenges in the health protection of medical teams in the Chinese Ebola treatment center, Liberia: a qualitative study. *Infect Dis Poverty* 7:92, 2018
- Lin CY, Peng YC, Wu YH, et al.: The psychological effect of severe acute respiratory syndrome on emergency department staff. *Emerg Med J* 24:12-7, 2007
- Liu C, Wang H, Zhou L, et al.: Sources and symptoms of stress among nurses in the first Chinese anti-Ebola medical team during the Sierra Leone aid mission: A qualitative study. *Int J Nurs Sci* 6:187-91, 2019



Liu X, Kakade M, Fuller CJ, et al.: Depression after exposure to stressful events: lessons learned from the severe acute respiratory syndrome epidemic. *Compr Psychiatry* 53:15-23, 2012

Lu YC, Shu BC, Chang YY, et al.: The mental health of hospital workers dealing with severe acute respiratory syndrome. *Psychother Psychosom* 75:370-5, 2006

Lung FW, Lu YC, Chang YY, et al.: Mental Symptoms in Different Health Professionals During the SARS Attack: A Follow-up Study. *Psychiatr Q* 80:107-16, 2009

Marjanovic Z, Greenglass ER, Coffey S: The relevance of psychosocial variables and working conditions in predicting nurses' coping strategies during the SARS crisis: an online questionnaire survey. *Int J Nurs Stud* 44:991-8, 2007

Matsuishi K, Kawazoe A, Imai H, et al.: Psychological impact of the pandemic (H1N1) 2009 on general hospital workers in Kobe. *Psychiatry Clin Neurosci* 66:353-60, 2012

Maunder R, Hunter J, Vincent L, et al.: The immediate psychological and occupational impact of the 2003 SARS outbreak in a teaching hospital. *Cmaj* 168:1245-51, 2003

Maunder RG, Lancee WJ, Balderson KE, et al.: Long-term psychological and occupational effects of providing hospital healthcare during SARS outbreak. *Emerg Infect Dis* 12:1924-32, 2006

Maunder RG, Lancee WJ, Rourke S, et al.: Factors associated with the psychological impact of severe acute respiratory syndrome on nurses and other hospital workers in Toronto. *Psychosom Med* 66:938-42, 2004

McAlonan GM, Lee AM, Cheung V, et al.: Immediate and sustained psychological impact of an emerging infectious disease outbreak on health care workers. *Can J Psychiatry* 52:241-7, 2007

McCormack L, Bamforth S: Finding authenticity in an altruistic identity: The 'lived' experience of health care humanitarians deployed to the 2014 Ebola crisis. *Traumatology* 25:289-96, 2019

McMahon SA, Ho LS, Brown H, et al.: Healthcare providers on the frontlines: a qualitative investigation of the social and emotional impact of delivering health services during Sierra Leone's Ebola epidemic. *Health Policy Plan* 31:1232-9, 2016

Mymin Kahn D, Bulanda JJ, Weissberger A, et al.: Evaluation of a support group for Ebola hotline workers in Sierra Leone. *International Journal of Culture and Mental Health* 9:164-71, 2016

Nickell LA, Crighton EJ, Tracy CS, et al.: Psychosocial effects of SARS on hospital staff: survey of a large tertiary care institution. *Cmaj* 170:793-8, 2004

Oh N, Hong N, Ryu DH, et al.: Exploring Nursing Intention, Stress, and Professionalism in Response to Infectious Disease Emergencies: The Experience of Local Public Hospital Nurses

- During the 2015 MERS Outbreak in South Korea. *Asian Nurs Res (Korean Soc Nurs Sci)* 11:230-6, 2017
- Park JS, Lee EH, Park NR, et al.: Mental Health of Nurses Working at a Government-designated Hospital During a MERS-CoV Outbreak: A Cross-sectional Study. *Arch Psychiatr Nurs* 32:2-6, 2018
- Phua DH, Tang HK, Tham KY: Coping responses of emergency physicians and nurses to the 2003 severe acute respiratory syndrome outbreak. *Acad Emerg Med* 12:322-8, 2005
- Poon E, Liu KS, Cheong DL, et al.: Impact of severe respiratory syndrome on anxiety levels of front-line health care workers. *Hong Kong Med J* 10:325-30, 2004
- Rambaldini G, Wilson K, Rath D, et al.: The impact of severe acute respiratory syndrome on medical house staff: a qualitative study. *J Gen Intern Med* 20:381-5, 2005
- Raven J, Wurie H, Witter S: Health workers' experiences of coping with the Ebola epidemic in Sierra Leone's health system: a qualitative study. *BMC Health Serv Res* 18:251, 2018
- Robertson E, Hershenfield K, Grace SL, et al.: The psychosocial effects of being quarantined following exposure to SARS: a qualitative study of Toronto health care workers. *Can J Psychiatry* 49:403-7, 2004
- Rowlands A: Medical social work practice and SARS in Singapore. *Soc Work Health Care* 45:57-83, 2007
- Shiao JS, Koh D, Lo LH, et al.: Factors predicting nurses' consideration of leaving their job during the SARS outbreak. *Nurs Ethics* 14:5-17, 2007
- Shih FJ, Gau ML, Kao CC, et al.: Dying and caring on the edge: Taiwan's surviving nurses' reflections on taking care of patients with severe acute respiratory syndrome. *Appl Nurs Res* 20:171-80, 2007
- Shih FJ, Turale S, Lin YS, et al.: Surviving a life-threatening crisis: Taiwan's nurse leaders' reflections and difficulties fighting the SARS epidemic. *J Clin Nurs* 18:3391-400, 2009
- Sim K, Chong PN, Chan YH, et al.: Severe acute respiratory syndrome-related psychiatric and posttraumatic morbidities and coping responses in medical staff within a primary health care setting in Singapore. *J Clin Psychiatry* 65:1120-7, 2004
- Smith MW, Smith PW, Kratochvil CJ, et al.: The Psychosocial Challenges of Caring for Patients with Ebola Virus Disease. *Health Secur* 15:104-9, 2017
- Son H, Lee WJ, Kim HS, et al.: Examination of Hospital Workers' Emotional Responses to an Infectious Disease Outbreak: Lessons From the 2015 MERS Co-V Outbreak in South Korea. *Disaster Med Public Health Prep* 13:504-10, 2019

Son H, Lee WJ, Kim HS, et al.: Hospital workers' psychological resilience after the 2015 Middle East respiratory syndrome outbreak. *Social Behavior and Personality: An International Journal* 47:1-13, 2019

Styra R, Hawryluck L, Robinson S, et al.: Impact on health care workers employed in high-risk areas during the Toronto SARS outbreak. *J Psychosom Res* 64:177-83, 2008

Su TP, Lien TC, Yang CY, et al.: Prevalence of psychiatric morbidity and psychological adaptation of the nurses in a structured SARS caring unit during outbreak: a prospective and periodic assessment study in Taiwan. *J Psychiatr Res* 41:119-30, 2007

Tam CW, Pang EP, Lam LC, et al.: Severe acute respiratory syndrome (SARS) in Hong Kong in 2003: stress and psychological impact among frontline healthcare workers. *Psychol Med* 34:1197-204, 2004

Tham KY, Tan YH, Loh OH, et al.: Psychiatric morbidity among emergency department doctors and nurses after the SARS outbreak. *Ann Acad Med Singapore* 33:S78-9, 2004

Tolomiczenko GS, Kahan M, Ricci M, et al.: SARS: coping with the impact at a community hospital. *J Adv Nurs* 50:101-10, 2005

Tse MM, Pun SP, Benzie IF: Experiencing SARS: perspectives of the elderly residents and health care professionals in a Hong Kong nursing home. *Geriatr Nurs* 24:266-9, 2003

Verma S, Mythily S, Chan YH, et al.: Post-SARS psychological morbidity and stigma among general practitioners and traditional Chinese medicine practitioners in Singapore. *Ann Acad Med Singapore* 33:743-8, 2004

Vinck L, Isken L, Hooiveld M, et al.: Impact of the 2009 influenza A(H1N1) pandemic on public health workers in the Netherlands. *Euro Surveill* 16, 2011

Waterman S, Hunter ECM, Cole CL, et al.: Training peers to treat Ebola centre workers with anxiety and depression in Sierra Leone. *Int J Soc Psychiatry* 64:156-65, 2018

Witter S, Wurie H, Chandiwana P, et al.: How do health workers experience and cope with shocks? Learning from four fragile and conflict-affected health systems in Uganda, Sierra Leone, Zimbabwe and Cambodia. *Health Policy Plan* 32:iii3-iii13, 2017

Wong EL, Wong SY, Kung K, et al.: Will the community nurse continue to function during H1N1 influenza pandemic: a cross-sectional study of Hong Kong community nurses? *BMC Health Serv Res* 10:107, 2010

Wong EL, Wong SY, Lee N, et al.: Healthcare workers' duty concerns of working in the isolation ward during the novel H1N1 pandemic. *J Clin Nurs* 21:1466-75, 2012

Wong TW, Yau JK, Chan CL, et al.: The psychological impact of severe acute respiratory syndrome outbreak on healthcare workers in emergency departments and how they cope. *Eur J Emerg Med* 12:13-8, 2005

Wong WC, Lee A, Tsang KK, et al.: How did general practitioners protect themselves, their family, and staff during the SARS epidemic in Hong Kong? *J Epidemiol Community Health* 58:180-5, 2004

Wu P, Fang Y, Guan Z, et al.: The psychological impact of the SARS epidemic on hospital employees in China: exposure, risk perception, and altruistic acceptance of risk. *Can J Psychiatry* 54:302-11, 2009
